# Supplementary material for: On-Pump versus Off-Pump Coronary-Artery Bypass Surgery
Source: Atypon-hosted journal article supplement (doi:10.1056/nejmoa0902905), 2009-11-04
Supplement: nejm_shroyer_1827sa1.pdf [file nejm_shroyer_1827sa1.pdf]

## Supplementary Appendix

This appendix has been provided by the authors to give readers additional information about their work.

Supplement to: Shroyer AL, Grover FL, Hattler B, et al. On-pump versus off-pump coronary-artery bypass surgery. N Engl J Med 2009;361:1827-37.

## Appendix A

### ROOBY Trial Participating Medical Centers

**VA Medical Center Albuquerque, NM**, Sarah Vernon MD, Stuart Pett MD, Charles Dietl MD, Jorge Wernly MD, Jeannie Collatz RN; **VA Medical Center Asheville, NC**, John Lucke MD, Peter McKeown, MD, John Kellemen, MD, Mariette Coyle RN, Keith Nicalo RN; **VA Medical Center Cleveland, OH**, Diana Whittlesey MD, Christiano Calderia MD, Brian Cmolik MD, Barbara Bauer RN; **VA Medical Center Dallas, TX**, Michael Jessen MD, Michael Dimaio MD, John Sum-Ping, MD, Wanda Frey RN, Michele Roesle, RN; **VA Medical Center Denver, CO**, Joseph Cleveland MD, Fred Grover, MD, Alden Harken, MD, Shauna Brennan RN; **VA Medical Center Durham, NC**, Walter Wolfe MD, Carmelo Milano MD, Kevin Landolpho MD, Shu Lin, MD, James Lowe MD, Jean Kistler RN; **VA Medical Center Gainesville, FL**, Felipe Urdaneta MD, Richard Schofield, MD, Edward Staples MD, Thomas Beaver MD, Terry Glover RN, Jan Hutchinson RN, Kristine Wynne RN; **VA Medical Center Manhattan, NY**, Eugene Grossi MD, Gregory Croke MD, Alfred Culliford MD, Charles Schwartz MD, George Gogoladze MD, Estelita Anteola RN; **VA Medical Center Los Angeles, CA**, Abbas Ardehali MD, Denis Baker MD, Fardad Esmailian MD, Ramin Beygui MD, Ramin Ebrahimi MD, Eileen Ziff RN, Rebecca Lopez, RN; **VA Medical Center Miami, FL**, Kushagra Katariya MD, Richard Thurer MD, Michele Landi RN; **VA Medical Center Milwaukee, WI**, Hossein Almassi MD, Alfred Nicolosi MD, Sharon Pecsí RN; **VA Medical Center Palo Alto, CA**, John Giacomini MD, Thomas Burdon MD, James Fann MD, Gerald Georgette RN, Dong Yu RN; **VA Medical Center Pittsburgh, PA**, Ali Sonel MD, Marco Zenati MD, Larry Shears MD, Lawrence Wei MD, Kenneth McCurry MD, Robert Kormos MD, Jennifer Gabany RN, Kathleen Ross RN, Alanna Macioce, RN; **VA Medical Center Portland, OR**, Pasala Ravichandran MD, John Blizzard MD, Matt Slatter MD, Howard Song MD, Karina Dana RN, Volio Kesic BS; **VA Medical Center San Francisco, CA**, Mark Ratcliffe MD, Jon Baker MD, Timothy Hall MD, Michael Mann MD, T.

Sloane Guy MD, Elaine Tseng MD, Mary Jane Wood RN; **VA Medical Center San Antonio, TX**, Edward Sako MD, Gregory Freeman MD, Andrea Carpenter MD, Daniel Martinez MD, V. Sreenath Reddy MD, Regina Whitener RN; **VA Medical Center Tampa, FL**, Dimitri Novitzky MD, Jennifer Darter RN, Jennifer Shippy MD, Rebecca Reinhard RN; **VA Medical Center Washington DC**, Pendleton Alexander MD, Greg Trachiotis, MD, Mary Bloom RN, Elizabeth Wyman PA.

### **ROOBY Trial Resources**

Chairman's Office: Department of Veterans Affairs, Denver, CO, Frederick L. Grover MD, A. Laurie Shroyer PhD, Janet Baltz RN; Department of Veterans Affairs; Tampa, FL, Dimitri Novitzky MD, PhD.

Neuropsychological Outcomes Core Laboratory: Department of Veterans Affairs, Denver, CO, Elizabeth Kozora PhD, Susan Kongs, Michael Hampton.

Central Cardiac Catheterization Laboratory: Department of Veterans Affairs, Denver, CO, Brack Hattler MD, John Messenger MD, Lisa Schade, MSHA, Krisann Bruton, Marianne Medlin.

Cooperative Studies Program Coordinating Center: VA Medical Center Perry Point, MD, Joseph Collins ScD, Douglas D Bradham DrPH, Annette Wiseman, Philip Connor, Dengfang Tang, Maxine Rhoads, Sandra Pritt, Diana Preston Smith, Jennifer Smith, Tina Carty, Dan Briones.

Cooperative Studies Program VA Central Office, Washington, DC: Timothy J. O'Leary, MD, PhD, Grant D. Huang, MPH, PhD.

Special consultants: Health-related Quality of Life (SF-36V) Department of Veterans Affairs, Denver, CO, John S. Rumsfeld, MD; Seattle Angina Questionnaire, University of Missouri-Kansas City, Kansas City, MO, John A. Spertus, MD

## **ROOBY Trial Committees**

Data and Safety Monitoring Board: Mark Starling MD, William Baumgartner MD, David Fullerton MD, Jennifer Gassman PhD, Barbara Hawkins PhD, and Joseph Naples MD.

Executive Committee: Douglas Bradham DrPH, Steven Berkowitz PhD, , Joseph Collins ScD, Frederick Grover MD, Brack Hattler MD, Elizabeth Kozora PhD, John Lucke MD, Gerald McDonald MD, Dimitri Novitzky MD, and A. Laurie Shroyer, PhD.

Human Rights Committee: Megan Arthur, Lettie Carr, Karen Cuenco MS PhD, James Crothers, Lisa Dixon MD, Alan Fix MD, Adele Gilphin JD, Edward Hobson, Rose Kurz PhD, and William McSherry PhD.

Planning Committee: Frederick Grover MD, A. Laurie Shroyer PhD, Dimitri Novitzky MD, Kit Arom MD, Douglas Bradham DrPH, Joseph Collins ScD, Ralph DePalma MD, Michael Ezekowitz MD, Gerald McDonald MD, Eric Peterson MD, and Gulshan Sethi MD.
